# Supplementary material for: PPARD May Play a Protective Role for Major Depressive Disorder
Source: Hindawi journal article supplement (doi:10.1155/2021/5518138), 2021-04-21
Supplement: f1 [file 5518138.f1.pdf]

### **Supplementary Material: PPARD\_MDD**

The Supplementary Materials is a multi-worksheet excel file that contains additional results described as follows.

- 1) Ref4Pathway: Reference information for the network built in Figure 1.
- 2) ExpressionOfPPARD: The expression of PPARD in 18 MDD RNA expression datasets and the co-expression analysis between PPARD and IL6 and TNF.
- 3) MLR results: The multiple linear regression analysis results for the potential factors influencing the PPARD expression in MDD patients.

The excel file is online available at: [www.gousinfo.com/database/Data\\_Genetic/PPARD\\_MDD.xlsx](http://www.gousinfo.com/database/Data_Genetic/PPARD_MDD.xlsx)
